# Supplementary material
Source: publisher figshare collection journal article supplement (https://acs.figshare.com/ndownloader/files/3780367)
Supplement: Supplementary file 1 [file 3780367]

## Supporting Information

# Increasing the Collision Rate of Particle Impact Electroanalysis with Magnetically Guided Pt-Decorated Iron Oxide Nanoparticles

Donald A. Robinson, Jason J. Yoo, Alma D. Castañeda, Radhika Dasari, Brett Gu, Richard M. Crooks, and Keith J. Stevenson\*

Department of Chemistry, The University of Texas at Austin, Austin, TX 78712, United States.

\*stevenson@cm.utexas.edu

| SI Contents                                                                                                                                                                                                                                                                                                                                                                                                                                                                                                                                                                                                                                                                                     | Page # |
|-------------------------------------------------------------------------------------------------------------------------------------------------------------------------------------------------------------------------------------------------------------------------------------------------------------------------------------------------------------------------------------------------------------------------------------------------------------------------------------------------------------------------------------------------------------------------------------------------------------------------------------------------------------------------------------------------|--------|
| <b>Figure S1.</b> (a) Powder XRD patterns for AT-IONP, Pt <sup>2+</sup> -IONP, and Pt-IONP along with (b) corresponding diffraction lines for Fe <sub>3</sub> O <sub>4</sub> , Fe <sub>0.91</sub> O, and Pt.                                                                                                                                                                                                                                                                                                                                                                                                                                                                                    | S2     |
| <b>Figure S2.</b> STEM images and corresponding EDX spectra for different hybrid Pt-IONP samples synthesized under different reaction conditions.                                                                                                                                                                                                                                                                                                                                                                                                                                                                                                                                               | S2     |
| <b>Figure S3.</b> XP spectra for (a) survey region, (b) Fe <sub>2p</sub> , (c) O <sub>1s</sub> , (d) N <sub>1s</sub> , (e) Cl <sub>2p</sub> , and (f) Pt <sub>4f</sub> regions for AT-IONP, Pt <sup>2+</sup> -IONP, and Pt-IONP.                                                                                                                                                                                                                                                                                                                                                                                                                                                                | S3     |
| <b>Figure S4.</b> Summary of XPS quantitative analysis with relative elemental composition.                                                                                                                                                                                                                                                                                                                                                                                                                                                                                                                                                                                                     | S3     |
| <b>Figure S5.</b> Electrocatalytic activity of Pt-IONPs for hydrazine oxidation: (a) Linear sweep voltammetry ( $v = 20$ mV/s) at various rotation rates for Pt-IONP catalyst film on GC RDE in the presence of 1.5 mM N <sub>2</sub> H <sub>4</sub> and 50 mM SPB, (b) corresponding Koutecky-Levich plot from electrocatalytic current at 0 V vs. Ag/AgCl, (c) cyclic voltammograms of Pt-IONP catalyst film in N <sub>2</sub> -purged 0.1 M KOH before (dashed line) and after (solid line) exposure to 650 s of CO bubbling while held at a constant potential of -0.6 V vs Hg/HgSO <sub>4</sub> , and (d) background corrected CO stripping peak that was integrated to determine Pt ECSA. | S4     |
| <b>Figure S6.</b> NTA results for a Pt-IONP sample diluted in ultra-high purity water to a concentration of 400 fM (by Pt-IONP aggregate).                                                                                                                                                                                                                                                                                                                                                                                                                                                                                                                                                      | S5     |
| <b>Figure S7.</b> Chronoamperometry of Pt-IONP collisions in microfluidic device without the application of a magnetic field.                                                                                                                                                                                                                                                                                                                                                                                                                                                                                                                                                                   | S6     |
| <b>Figure S8.</b> Digital photographs of (a) magnetic lens and (b) microfluidic device sitting atop the magnetic lens.                                                                                                                                                                                                                                                                                                                                                                                                                                                                                                                                                                          | S7     |
| <b>Figure S9.</b> Digital photographs of Pt-IONP accumulation resulting from attraction to the magnetic lens.                                                                                                                                                                                                                                                                                                                                                                                                                                                                                                                                                                                   | S7     |
| <b>Figure S10.</b> (a) Histograms of EA collision current magnitudes and (b) corresponding average Pt ECSA for particle impact experiments of 60 fM Pt-IONPs in 15 mM N <sub>2</sub> H <sub>4</sub> and 50 mM SPB (pH 7.5) with and without the magnetic lens applied.                                                                                                                                                                                                                                                                                                                                                                                                                          | S8     |
| <b>Table S1.</b> Nanoparticle tracking analysis summary for Pt-IONPs.                                                                                                                                                                                                                                                                                                                                                                                                                                                                                                                                                                                                                           | S5     |
| <b>Movie S1.</b> Time-lapse TEM video of Pt nucleation upon reduction induced by electron beam. Video speed is increased by a factor of 12 from real time. AVI file is available for download at <a href="http://pubs.acs.org">http://pubs.acs.org</a> .                                                                                                                                                                                                                                                                                                                                                                                                                                        |        |

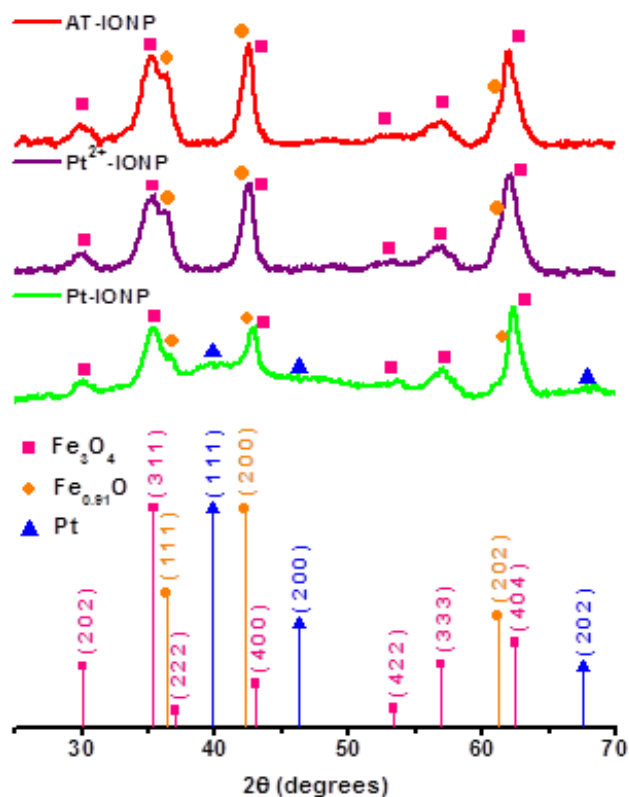

**Figure S1.** (a) Powder XRD patterns for AT-IONP, Pt<sup>2+</sup>-IONP, and Pt-IONP along with (b) corresponding diffraction lines for Fe<sub>3</sub>O<sub>4</sub>, Fe<sub>0.91</sub>O, and Pt.<sup>1-3</sup>

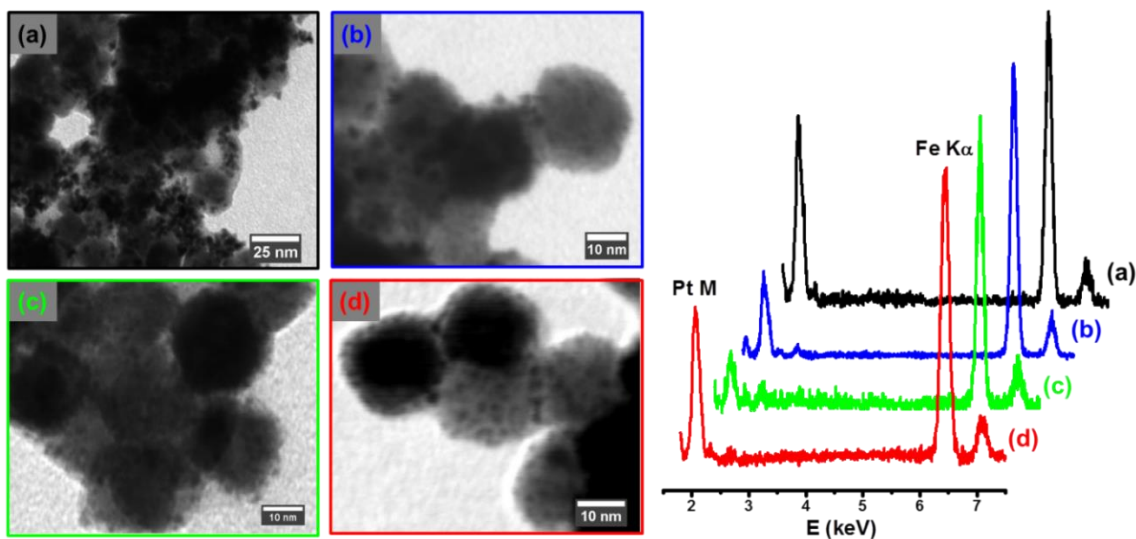

**Figure S2.** (left panel) STEM images and (right panel) corresponding EDX spectra for different hybrid Pt-IONP samples synthesized under different reaction conditions: (a) using naked IONPs without hydroxylamine, (b) using naked IONPs with hydroxylamine, (c) using AT-IONPs without hydroxylamine, and (d) using AT-IONPs with hydroxylamine. All EDX spectra were normalized by the Fe K<sub>α</sub> peak intensity.

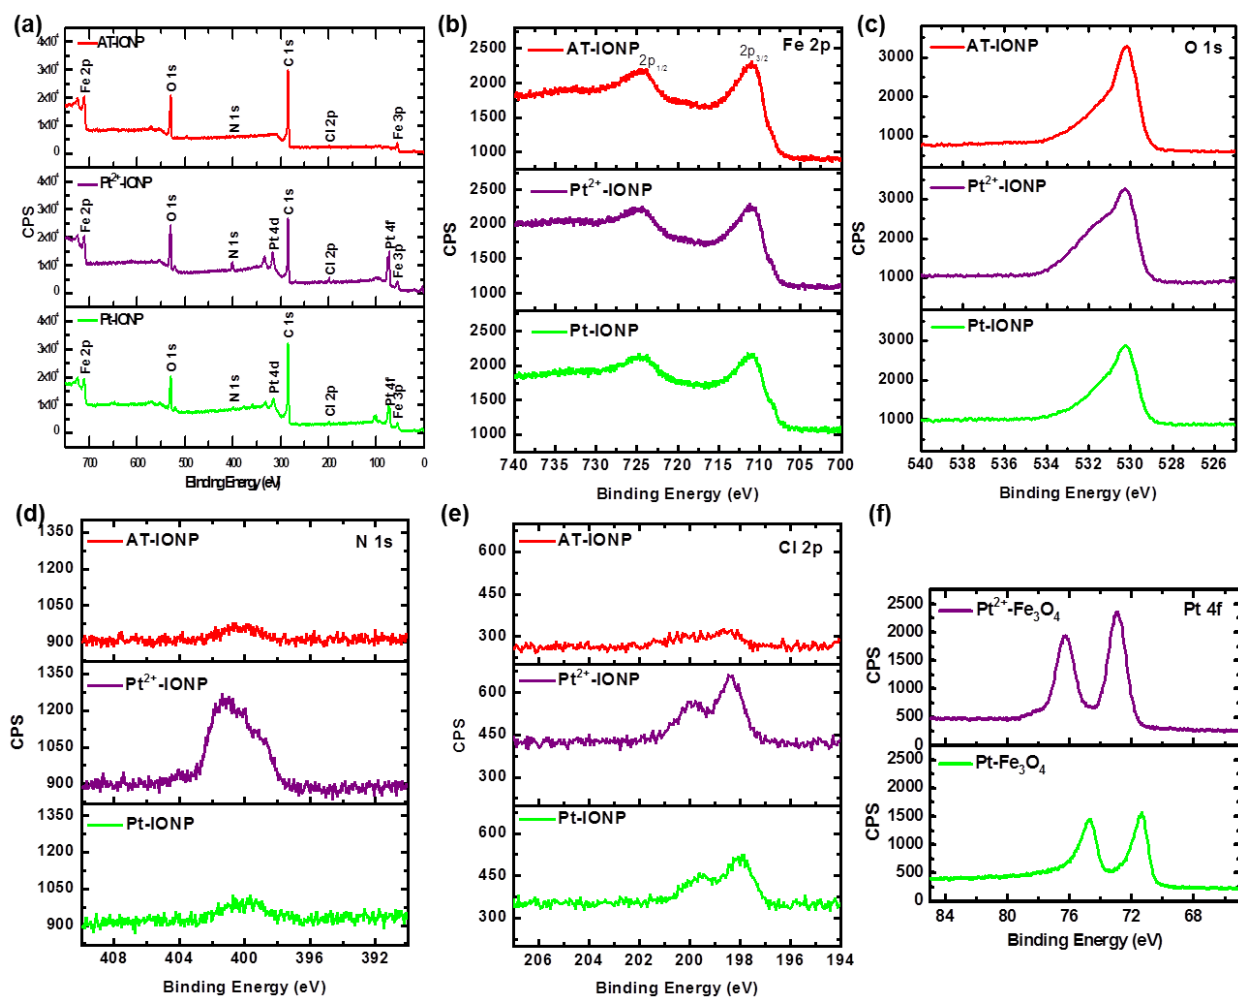

**Figure S3.** XPS spectra for (a) survey region, (b) Fe<sub>2p</sub>, (c) O<sub>1s</sub>, (d) N<sub>1s</sub>, (e) Cl<sub>2p</sub>, and (f) Pt<sub>4f</sub> regions for AT-IONP, Pt<sup>2+</sup>-IONP, and Pt-IONP.

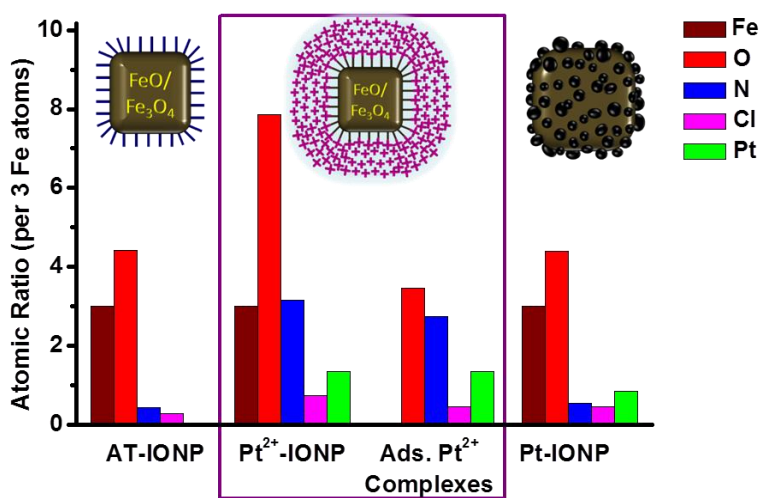

**Figure S4.** Summary of XPS quantitative analysis with relative elemental composition normalized by Fe atomic % and multiplied by 3 to relate to stoichiometry of Fe<sub>3</sub>O<sub>4</sub>. The data for the adsorbed species is simply the difference between that of Pt<sup>2+</sup>-IONP and AT-IONP.

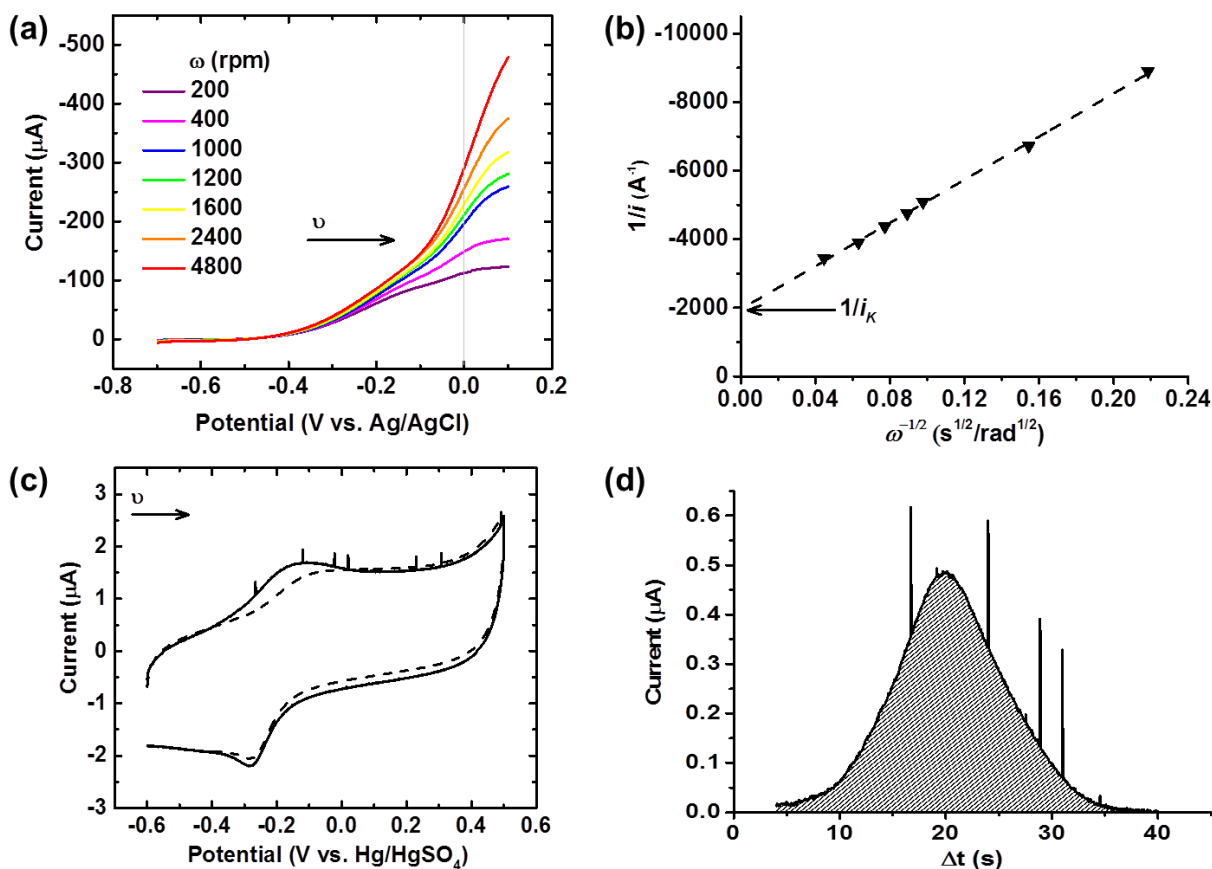

**Figure S5:** Electrocatalytic activity of Pt-IONPs for hydrazine oxidation: (a) Linear sweep voltammetry ( $\nu = 20$  mV/s) at various rotation rates for Pt-IONP catalyst film on GC RDE in the presence of 1.5 mM  $\text{N}_2\text{H}_4^*$  and 50 mM SPB, (b) corresponding Koutecky-Levich plot from electrocatalytic current at 0 V vs. Ag/AgCl, (c) cyclic voltammograms of Pt-IONP catalyst film in  $\text{N}_2$ -purged 0.1 M KOH before (dashed line) and after (solid line) exposure to 650 s of CO bubbling while held at a constant potential of -0.6 V vs Hg/HgSO<sub>4</sub>, and (d) background corrected CO stripping peak that was integrated to determine Pt ECSA.

\*RDE voltammetry of Pt-IONP/C catalyst was performed in 1.5 mM  $\text{N}_2\text{H}_4$  instead of the 15 mM concentration used later for collision experiments. It was necessary to use a lower concentration of  $\text{N}_2\text{H}_4$  for RDE experiments in order to avoid excessive  $\text{N}_2$  bubble formation. In 15 mM  $\text{N}_2\text{H}_4$ , excessive gas bubbles were observed on the electrode surface and the resulting Koutecky-Levich plot was nonlinear (data not shown).

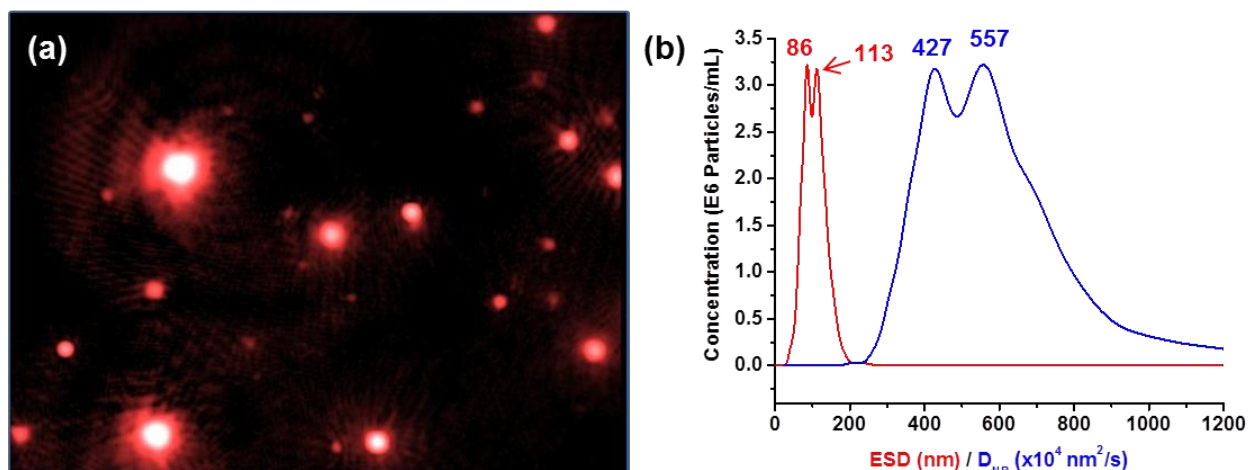

**Figure S6.** NTA results for a Pt-IONP sample diluted from a stock solution by a factor of 100 in ultra-high purity water to a concentration of 400 fM (by Pt-IONP aggregate): (a) snapshot from video acquired to track NP Brownian motion, (b) nanoparticle diffusion coefficient ( $D_{NP}$ ) and equivalent spherical diameter (ESD) distributions.

**Table S1. Nanoparticle Tracking Analysis Summary for Pt-IONPs**

| Solution Conditions                             | ESD                        | $D_{NP}$                                                     | $C_{NP}$                                  |                  |
|-------------------------------------------------|----------------------------|--------------------------------------------------------------|-------------------------------------------|------------------|
|                                                 | Mean ( $\pm$ s.d.)<br>(nm) | Mean ( $\pm$ s.d.)<br>( $\times 10^{-8}$ cm <sup>2</sup> /s) | Diluted Sample<br>( $\times 10^6$ NPs/mL) | Stock<br>(pM)    |
| Pure water                                      | 110 ( $\pm 30$ )           | 4 ( $\pm 2$ )                                                | 240                                       | 40.              |
| 50 mM SPB                                       | 110 ( $\pm 40$ )           | 4 ( $\pm 2$ )                                                | 310                                       | 51               |
| 50 mM SPB + 15 mM N <sub>2</sub> H <sub>4</sub> | 110 ( $\pm 40$ )           | 4 ( $\pm 2$ )                                                | 240                                       | <sup>ψ</sup> 40. |

<sup>ψ</sup>Stock Pt-IONP concentration for EA

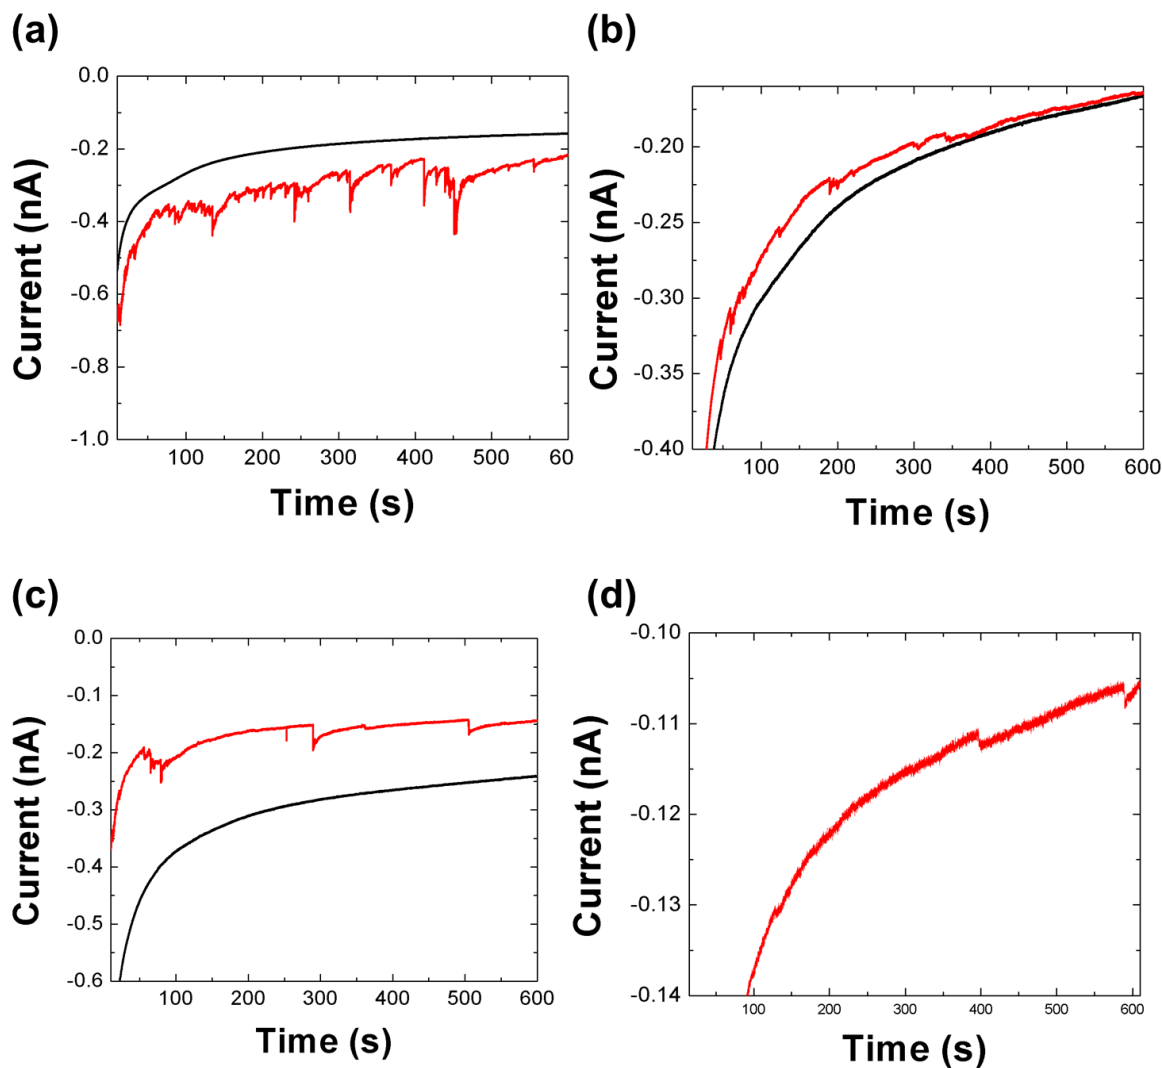

**Figure S7:** Chronoamperometry of Pt-IONP collisions in microfluidic device without the application of a magnetic field in the presence of 15 mM  $\text{N}_2\text{H}_4$  in 50 mM SPB (pH 7.5). Black traces correspond to control scan without any Pt-IONPs added and red traces refer to Pt-IONP concentrations of (a) 702 fM, (b) 280 fM, (c) 140 fM, and (d) 57 fM.

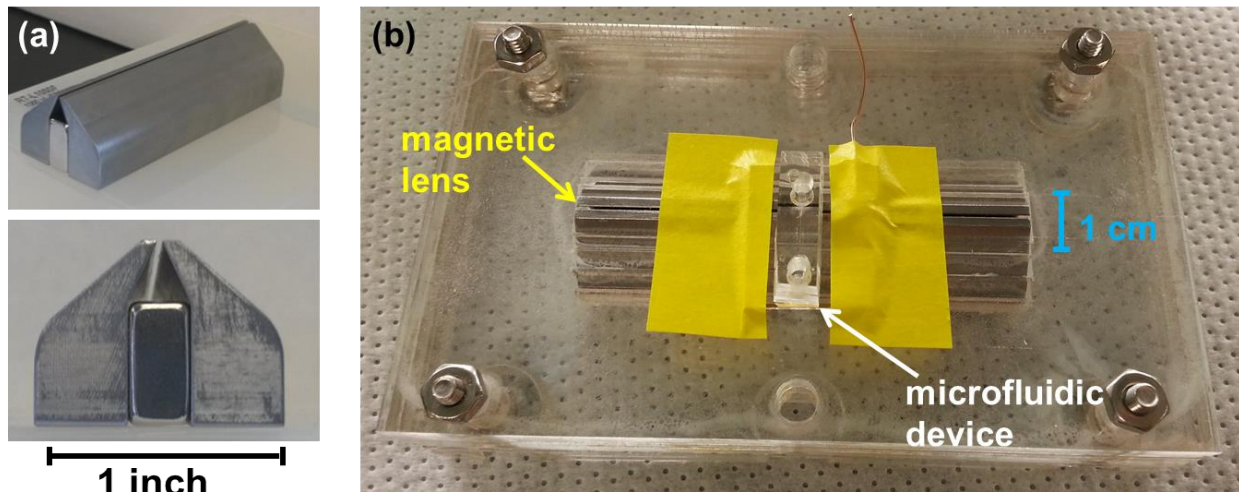

**Figure S8:** Photographs of (a) magnetic lens and (b) microfluidic device sitting atop the magnetic lens.

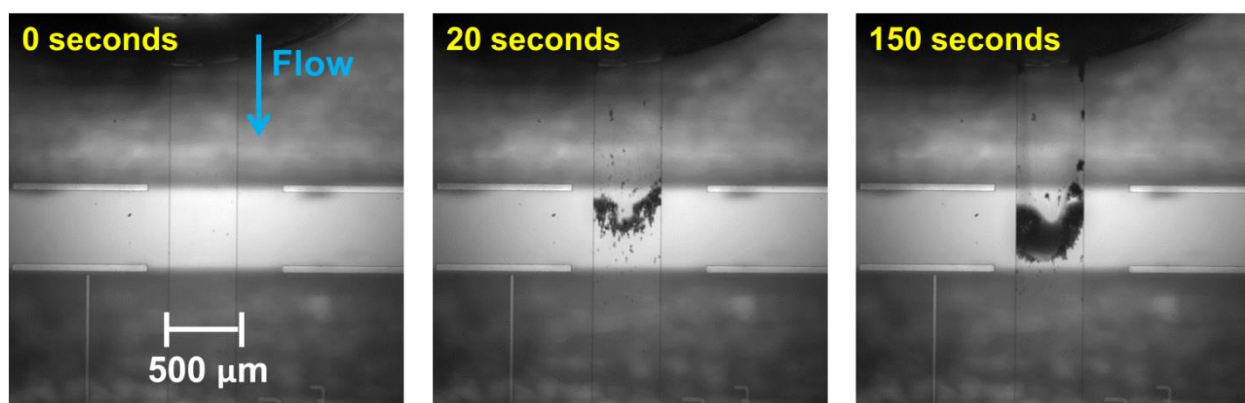

**Figure S9:** Photographs of Pt-IONP accumulation resulting from attraction to the magnetic lens. The channel width is 500  $\mu\text{m}$  and the Pt-IONP concentration is 40 pM. Gravity-driven flow was accomplished by adding 60  $\mu\text{L}$  of solution in the inlet and 20  $\mu\text{L}$  in the outlet.



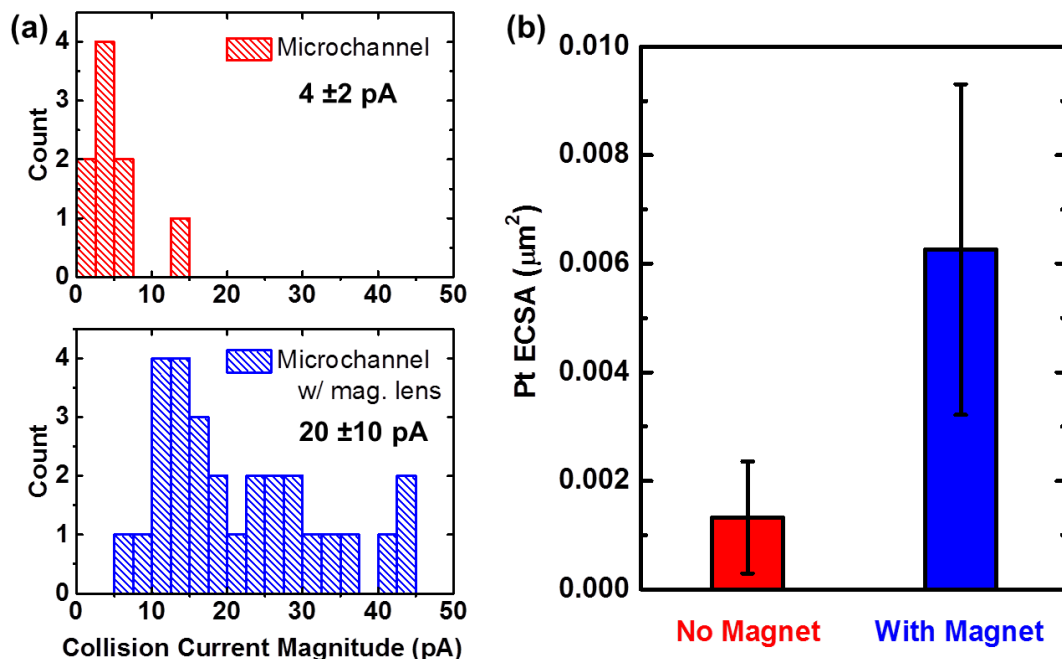

**Figure S10:** (a) Histograms of EA collision current magnitudes and (b) corresponding average Pt ECSA for particle impact experiments of 60 fM Pt-IONPs in 15 mM  $\text{N}_2\text{H}_4^*$  and 50 mM SPB (pH 7.5) with and without the magnetic lens applied.

\*Recall that the Pt specific activity in the presence of 1.5 mM  $\text{N}_2\text{H}_4$  in 50 mM SPB was found to be 34.9 mA/cm². Assuming the Pt activity is directly proportional to  $\text{N}_2\text{H}_4$  concentration, the Pt specific activity in 15 mM  $\text{N}_2\text{H}_4$  was therefore approximated as 350 mA/cm² (due to 10-fold increase in  $\text{N}_2\text{H}_4$  concentration). The Pt ECSA values presented in Figure S10b were estimated by dividing the averaged data shown in Figure S10a by 350 mA/cm².

## REFERENCES

- (1) Gražulis, S.; Chateigner, D.; Downs, R. T.; Yokochi, A. F. T.; Quiros, M.; Lutterotti, L.; Manakova, E.; Butkus, J.; Moeck, P.; Le Bail, A. Crystallography Open Database - An Open-Access Collection of Crystal Structures. *J. Appl. Crystallogr.* **2009**, *42*, 726–729.
- (2) Gražulis, S.; Daškevič, A.; Merkys, A.; Chateigner, D.; Lutterotti, L.; Quirós, M.; Serebryanaya, N. R.; Moeck, P.; Downs, R. T.; Le Bail, A. Crystallography Open Database (COD): An Open-Access Collection of Crystal Structures and Platform for World-Wide Collaboration. *Nucleic Acids Res.* **2012**, *40*, D420–D427.
- (3) Downs, R. T.; Hall-Wallace, M. The American Mineralogist Crystal Structure Database. *Am. Mineral.* **2003**, *88*, 247–250.
